# Supplementary material
Source: publisher figshare collection journal article supplement (https://acs.figshare.com/ndownloader/files/4916824)
Supplement: Supplementary file 1 [file 4916824]

## Supplementary Information

### **Sialic acid-targeted nanovectors with phenylboronic acid-grafted polyethylenimine robustly enhance siRNA-based cancer therapy**

Manyi Ji<sup>a, b†</sup>, Ping Li<sup>a†</sup>, Nan Sheng<sup>a, b†</sup>, Lanlan Liu<sup>a</sup>, Hong Pan<sup>a</sup>, Ce Wang<sup>a</sup>, Lintao Cai<sup>a</sup>,  
Yifan Ma<sup>a\*</sup>

<sup>a</sup> Key Lab of Health Informatics of Chinese Academy of Sciences, Guangdong Key Laboratory of Nanomedicine, Shenzhen Institutes of Advanced Technology, Chinese Academy of Sciences, Shenzhen 518055, P. R. China.

<sup>b</sup>Nano Science and Technology Institute, University of Science and Technology of China, Suzhou, 215123, China

† These authors equally contributed to this paper.

\*Correspondence to: Dr. Yifan Ma. Shenzhen Institutes of Advanced Technology, Chinese Academy of Science, 1068 Xueyuan Avenue, Shenzhen University Town, Shenzhen 518055, P. R. China. Tel: +86-755-86395216. Fax: +86-755-86392299. Email: [yf.ma@siat.ac.cn](mailto:yf.ma@siat.ac.cn)

## **Supporting information**

Supporting information Table S1: Sequences of siRNA and primers

Supporting information Figure S1. Cytotoxicity of free PBA in MCF-7 cells.

Supporting information Figure S2. Sizes and zeta potentials of PEI-PBA/siRNA nanocomplexes.

Supporting information Figure S3. RNase protection assay of PEI-PBA/siRNA nanocomplexes in FBS/PBS (V/V=1:1).

Supporting information Figure S4. The uptake of siRNA by MCF-7 cells.

Supporting information Figure S5. Bio-distribution of PEI-PBA/ siPLK1 in tumor-bearing mice.

Supporting information Figure S6. Expression of PLK1 mRNA in tumors.

Supporting information Figure S7. The effect of PEI-PBA/siPLK1 on pro-inflammatory cytokine production in mouse splenocytes

**Table S1 Sequences of siRNA and primers**

| Names                     | Sequences                                                                                  |
|---------------------------|--------------------------------------------------------------------------------------------|
| PLK1 siRNA                | 5'-UGAAGAAGAUCACCCUCCUAdTdT-3' (sense)<br>5'-UAAGGAGGGUGAUCUUCUUCAdTdT-3' (antisense)      |
| negative control<br>siRNA | 5'-UUCUCCGAACGUGUCACGUTT-3' (sense)<br>5'-ACGUGACACGUUCGGAGAATT-3' (antisense)             |
| PLK1 primers              | 5'- AGCCTGAGGCCCCGATACTACCTAC -3' (forward)<br>5'- ATTAGGAGTCCCACACAGGGTCTTC -3' (reverse) |
| $\beta$ -actin primers    | 5'-CGCGAGAAGATGACCCAGATC-3' (forward)<br>5'-CATGAGGTAGTCAGTCAGGTCCC-3' (reverse)           |

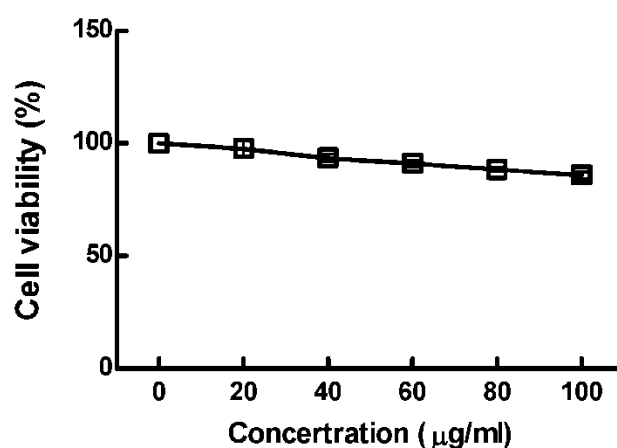

**Figure S1. Cytotoxicity of free PBA in MCF-7 cells.** MCF-7 cells were treated with 0-100 mg/ml of 3-aminophenylboronic acid hydrochloride for 24 h, and the cell viability was determined using MTT.

Data shown are mean  $\pm$  SE, n=4.

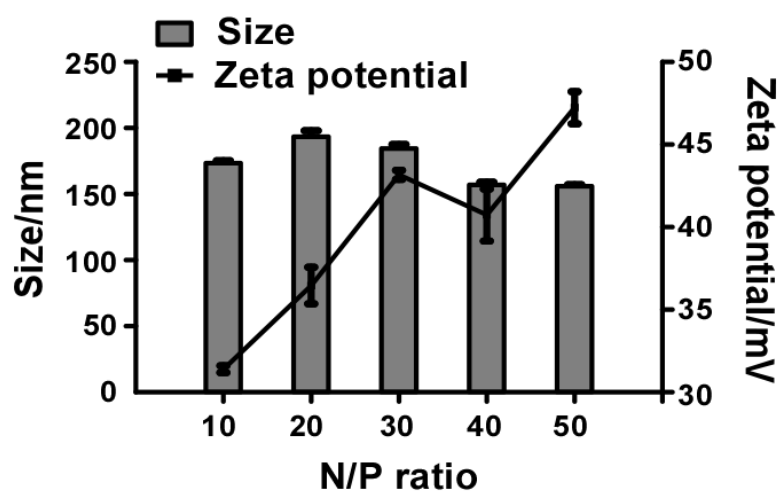

Figure S2. Sizes and zeta potentials of PEI-PBA/siRNA nanocomplexes.

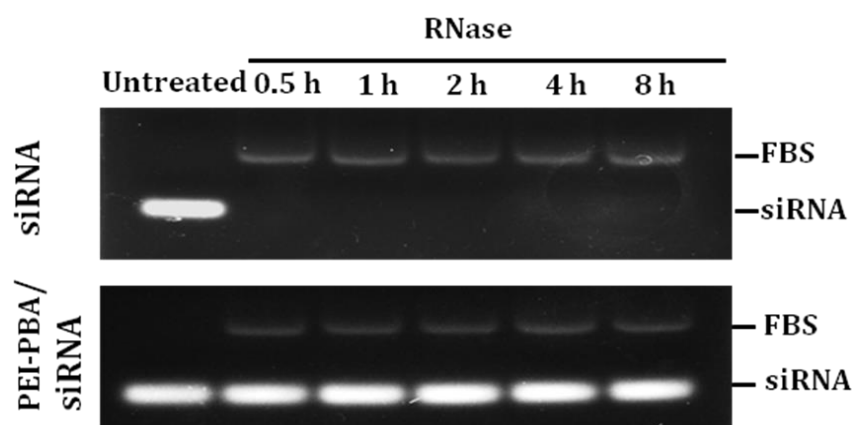

Figure S3. RNase protection assay of PEI-PBA/siRNA nanocomplexes in FBS/PBS (V/V=1:1).

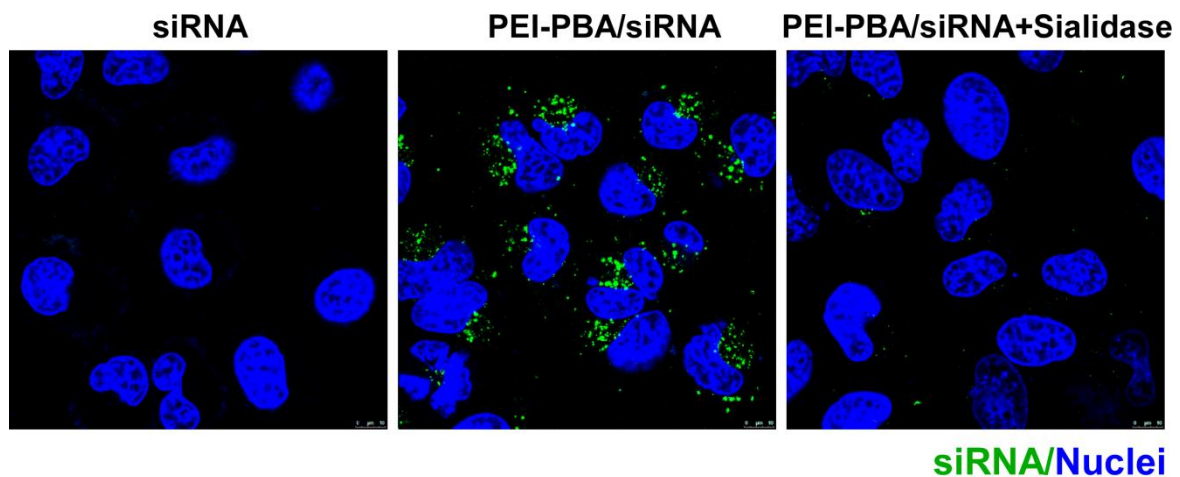

**Figure S4. The uptake of siRNA by MCF-7 cells.** MCF-7 cells were pretreated with or without sialidase (40 mU/ml) overnight, followed by incubation with FAM-siRNA (Green) or PEI-PBA/siRNA for additional 4 h. The cells were then labeled with Hoechst to identify nucleus, and the cellular uptake of siRNA was determined using confocal microscopy.

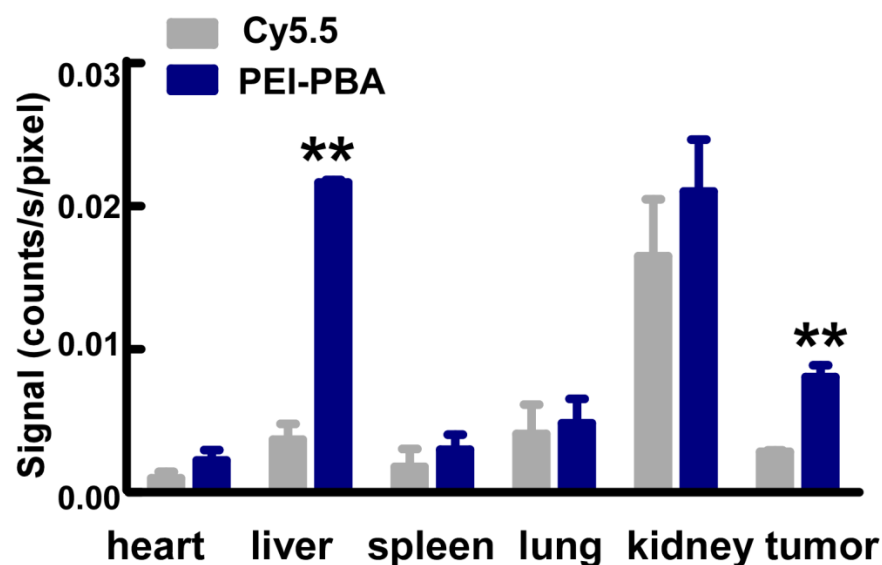

**Figure S5. Bio-distribution of PEI-PBA/ siPLK1 in tumor-bearing mice.** Tumor-bearing mice were i.v. injected with Cy5.5+ siRNA (Cy5.5) or Cy5.5-PEI- PBA/siRNA (PEI-PBA), and the fluorescent intensity of excised tumors and organs was measured at 48 h. Bars shown are mean  $\pm$  SE. Differences between two groups were analyzed using student's t test. \*\*:  $p < 0.01$ .

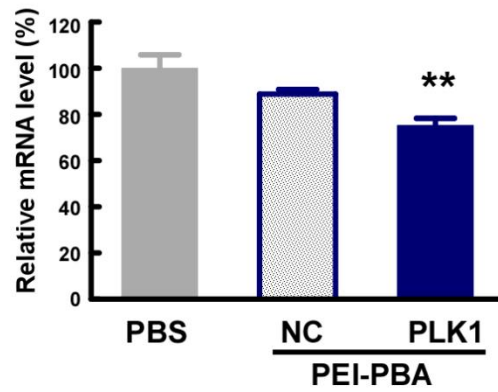

**Figure S6. Expression of PLK1 mRNA in tumors.** MCF-7 tumor-bearing mice were i.v. injected with PBS, PEI-PBA/PLK1 siRNA (PEI-PBA/siPLK1) or PEI-PBA/control siRNA (PEI-PBA/siNC) every two days for 6 dosages. The mRNA level of PLK1 in tumors was analyzed using quantitative RT-PCR. Bars shown are mean  $\pm$  SE (n= 4-6), and differences between PBS and treated groups were analyzed by one-way ANOVA. \*\*:  $p < 0.01$ .

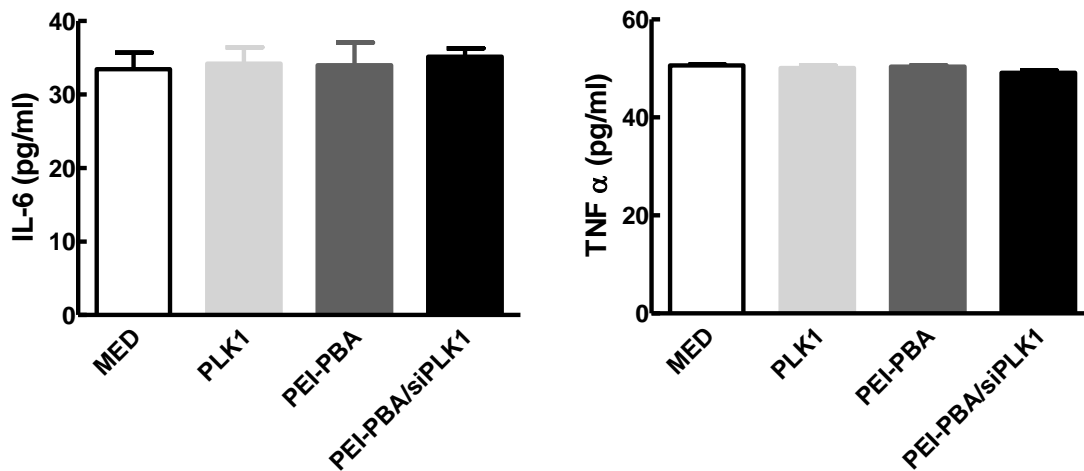

**Figure S7. The effect of PEI-PBA/siPLK1 on pro-inflammatory cytokine production in mouse splenocytes.** Spleens were removed from 6-wk-old BALB/c mice, and then gently pressed through a nylon mesh to generate single cell suspensions. Splenocytes were then incubated with PLK1 siRNA, PEI-PBA, or PEI-PBA/PLK1 siRNA (PEI-PBA/siPLK1) at 37 °C for 24 h. The cytokine levels in culture supernatants were determined by ELISA.
